# Supplementary material for: Potential impact of a nonavalent HPV vaccine on the occurrence of HPV-related diseases in France
Source: PubMed Central journal article supplement (PMC4433025; doi:10.1186/s12889-015-1779-1), 2015-05-02
Supplement: 12889_2015_1779_MOESM1_ESM.pdf [file 12889_2015_1779_MOESM1_ESM.pdf]

Supplementary Table S1: Definition of low and high estimates

|                             | <b>Low estimate</b>                                                                                                                                                                                                                                                                                      | <b>High estimate</b>                                                                                                                                                                                                                                                                                  |
|-----------------------------|----------------------------------------------------------------------------------------------------------------------------------------------------------------------------------------------------------------------------------------------------------------------------------------------------------|-------------------------------------------------------------------------------------------------------------------------------------------------------------------------------------------------------------------------------------------------------------------------------------------------------|
| <b>Quadrivalent vaccine</b> | Single infections 6<br>Single infections 11<br>Single infections 16<br>Single infections 18<br>Multiple infections 6/11/16/18 <i>excluding any other HPV type</i>                                                                                                                                        | Single infections 6<br>Single infections 11<br>Single infections 16<br>Single infections 18<br>Multiple infections 6/11/16/18 with or without another HPV type                                                                                                                                        |
| <b>Nonavalent vaccine</b>   | Single infections 6<br>Single infections 11<br>Single infections 16<br>Single infections 18<br>Single infections 31<br>Single infections 33<br>Single infections 45<br>Single infections 52<br>Single infections 58<br>Multiple infections 6/11/16/18/31/33/45/52/58 <i>excluding any other HPV type</i> | Single infections 6<br>Single infections 11<br>Single infections 16<br>Single infections 18<br>Single infections 31<br>Single infections 33<br>Single infections 45<br>Single infections 52<br>Single infections 58<br>Multiple infections 6/11/16/18/31/33/45/52/58 with or without another HPV type |
